# Supplementary material for: Effect of metformin monotherapy on serum lipid profile in statin-naïve individuals with newly diagnosed type 2 diabetes mellitus: a cohort study
Source: PeerJ. 2018 Apr 12;6:e4578. doi: 10.7717/peerj.4578 (PMC5899882; doi:10.7717/peerj.4578)
Supplement: Supplemental Information 1 [file peerj-06-4578-s001.xls]

## Sheet: 工作表1
Patient ID	Age (years)	Gender	HbA1C (%) at 0 month	HbA1C (%) at 6 months	HbA1C (%) at 12 months	Creatinine (mg/dL)	Weight (kg) at 0 month	Weight (kg) at 12 months	Height (cm)	urine ACR (mg per day)	alanine aminotransferase (U/mL)	Triglyceride (mg/dL) at 0 month	High density lipoprotein cholesterol (mg/dL) at 0 month	Low density lipoprotein cholesterol (mg/dL) at 0 month	Systolic blood pressure (mm Hg)	Metformin dose (mg per day)	Triglyceride (mg/dL) at 6 months	High density lipoprotein cholesterol (mg/dL) at 6 months	Low density lipoprotein cholesterol (mg/dL) at 6 months	Triglyceride (mg/dL) at 12 months	High density lipoprotein cholesterol (mg/dL) at 12 months	Low density lipoprotein cholesterol (mg/dL) at 12 months
1	38	M	10.7	6.2	5.1	0.92	118	119	174	81.7	140	132	27	132	127	1000	74	29	98	104	41	140
2	47	M	7.8	4.7	5.7	1.04	85	82	174	11.2	83	135	45	128	135	2000	199	39	109	197	36	107
3	62	M	10.6	7.2	6.8	1	74	74	164	58.5	51	106	38	159	120	1000	128	37	118	172	33	128
4	70	M	8.5	5.7	5.8	0.82	65.9	66	158	31.87	25	72	52	147	121	1500	110	47	179	152	32	108
5	59	F	6.7	6.5	6.4	0.8	52	52	154	16.7	6	113	56	163	118	2000	122	54	172	111	55	117
6	66	M	8.6	8.3	7.4	0.86	88.5	93	165	15.88	41	159	45	93.2	131	1000	81	50	73	137	58	111
7	74	M	8.4	5.9	6	1	54.5	53	161	11.6	15	70	43	96	115	1500	70	41	93	76	42	101
8	62	M	7.3	6	5.9	0.86	76	76.3	182	10.8	19	133	37	119	128	1000	142	43	134	129	35	70
9	75	F	7.7	7.1	6.8	0.39	68.5	69	158	11.8	12	97	50	98	127	2000	90	62	94	82	63	89
10	68	F	9.3	5.7	5.7	1.25	58.5	53	150	114.4	35	96	51	125	167	1500	84	56	131	70	68	137
11	41	M	6.7	6.5	6	0.89	63	61	167	5.18	36	128	55	101	105	1500	34	62	109	43	62	102
12	54	F	6.4	8.5	8.5	0.56	69	62	162	7.03	22	113	35	109	134	1000	77	47	91	68	45	88
13	53	F	6.3	9.9	7	0.68	81	88	158	997	24	113	86	212	130	1000	38	108	80	44	99	107
14	72	F	8	6.3	6.5	0.7	62.3	54	147	0.3	31	83	68	108	131	1000	72	62	108	74	56	117
15	67	M	7.4	6.1	5.7	0.87	70.5	69	167	1.3	18	42	43	112	145	2000	48	44	94	42	42	117
16	40	F	7.8	6.7	6.6	0.71	97	94	165	1.7	52	158	35	96	126	1000	126	45	113	127	46	109
17	62	M	7.3	6.4	6.4	0.91	104	106	174	102	76	84	30	109	144	2000	179	24	100	143	26	90
18	71	M	7	6.5	6.7	1	58.6	58.3	163	2.5	23	62	52	139	136	1000	59	55	151	43	52	72
19	67	M	8.4	7.3	6.7	1.2	69	70	168	6	14	91	48	91	126	1000	106	40	128	205	46	172
20	72	M	14.1	7	7	1.03	59	59	160	12.99	21	187	38	140	134	1000	117	35	139	109	31	61
21	47	M	6.6	6.6	6	1.31	77	77	173	203.73	17	131	47	48	152	2000	60	53	86	88	57	62
22	65	M	14.2	6.9	6.7	1.53	61	60	161.6	41.13	38	74	59	122	168	2000	135	45	115	67	47	111
23	74	F	7.2	5.6	5.4	0.91	61	62	154.3	28.47	53	483	46	155	140	1500	150	60	108	160	60	116
24	61	M	7.6	6.4	6.2	1.35	68	61	150.7	7.36	28	69	53	117	126	1500	82	49	161	103	35	70
25	40	M	10.7	6.3	6.3	0.94	87	85	172	4.5	85	119	42	99	149	1000	195	42	129	195	42	129
26	47	F	6.4	7.1	6.7	1.06	68	66	163	0	18	207	31	116	123	1000	156	33	94	132	33	118
27	68	M	6.5	6.6	6.3	0.89	67	69	163	4.18	24	51	48	53	116	1000	115	40	80	68	40	89
28	37	M	10.1	7.2	6	0.68	79.5	79	160	0	57	153	42	145.6	144	1500	93	46	142	93	46	142
29	44	F	7.4	7	6.8	0.9	86	87	465	13.4	31	85	38	137	130	2000	99	38	137	99	38	137
30	56	M	13.2	7.1	6.1	0.96	96	78	176	19.4	60	72	38	170	136	2000	87	38	65	123	45	142
31	44	F	7.3	6.3	6.5	0.65	66	72	154.5	57.2	43	156	44	244	98	1000	97	43	103	116	47	88
32	73	F	6.6	8.1	6.8	0.8	65	64	151	5.09	33	103	66	74	128	1000	108	60	59	172	63	85
33	62	M	9.2	6.7	6.7	1.03	65	64.8	165	7.3	60	126	17	98	127	1000	76	33	114	84	37	122
34	67	F	6.4	6.6	6.7	0.75	52	52	156.9	8.6	20	88	62	128	144	1000	65	62	109	83	48	118
35	74	M	9	6.3	5.8	1.24	52.2	55	155	14.02	19	64	41	95	125	1000	43	41	81	28	37	77
36	73	F	6.2	6.5	6.3	0.8	43.4	48	151	5.8	17	100	66	136	117	1500	119	66	136	69	65	121
37	81	F	8.4	6.9	6.5	0.9	80	73	161	12.5	27	83	41	112	130	1000	100	37	103	100	37	103
38	66	F	8.3	5.9	6	0.84	52	51	151	26.2	18	190	45	138	120	1000	86	54	89	92	54	85
39	59	M	9.1	7.4	7.8	0.68	65.6	70	163	383	13	92	42	74.4	112	1000	148	37	74	63	38	64
40	59	M	8.5	6.7	6.8	1	58	60	165	19.96	22	104	30	114	127	1500	94	30	114	60	38	130
41	80	F	8.4	6.6	6.9	0.8	52	49	149	18.8	26	232	43	177	139	1000	181	53	139	259	52	122
42	64	F	7.4	6.2	6.6	0.73	72	71	169	11.27	43	86	56	128	130	1500	92	67	126	124	43	97
43	45	F	7.1	8	7	0.59	70	70	165	132.6	17	331	38	69	120	1000	497	41	93	253	41	93
44	55	F	7.7	7.2	6.7	0.62	50	50	150	18.6	55	112	58	145.6	132	1000	50	58	74	63	63	84
45	76	M	9.4	8	8	0.9	72.5	66	160	38.4	18	109	65	88.8	161	1000	120	53	94	55	54	93
46	49	F	6.9	5.5	5.8	0.76	52	55	161	16.9	26	161	49	111	141	1000	140	40	118	148	49	108
47	40	F	6.1	5.5	5.9	0.66	76.5	78	166	8.5	99	156	38	154	130	1000	158	32	83	134	32	101
48	61	F	6.2	7.1	6.5	0.53	52	51	146	8	39	209	44	116	120	2000	176	41	118	158	42	123
49	63	M	7.8	6.5	6.2	0.98	80	80	160	20.9	142	199	47	106	120	1500	152	37	116	126	29	139
50	76	F	6.6	7.1	8	0.77	55.7	53	151	119.8	18	202	37	70	151	1000	191	45	140	185	37	117
51	40	M	16	5.3	6.2	0.78	66.8	66	168	15.9	16	213	27	171	123	2000	83	37	149	77	51	154
52	53	M	7.6	6	6.5	0.73	69.5	70	164	18.59	21	261	40	77	122	2000	345	37	55	175	45	96
53	59	M	7	6.4	6.2	0.94	60	60	161	10	23	326	31	133	103	1000	261	40	51	217	38	95
54	42	M	7.4	5.4	5.7	0.79	63	65	168	30.9	29	143	25	37	115	1000	67	25	37	128	35	82
55	65	F	6.8	6.3	6	0.9	79	79	164	14	75	236	47	138	130	2000	193	52	140	199	38	119
56	51	M	10.8	6.8	6.5	0.96	84	82	170	9	23	255	43	103	130	2000	148	38	100	215	51	113
57	65	F	7	6.1	5.9	0.62	49.5	50	156	11	16	121	41	60	120	1000	151	42	73	135	49	111
58	74	M	7	7.6	7.6	0.7	55	54	170	8.5	12	112	28	116	149	1000	91	24	96	79	26	79
59	43	M	7.3	8.4	6.6	0.8	70	69	172	8.5	32	75	55	128	130	1500	99	50	66	180	43	91
60	67	F	15	6.2	6.4	0.81	60	62	158	12.2	43	154	34	194	130	1000	226	45	155	242	39	156
61	57	F	7	7.8	7.8	0.61	60	53	157	132	20	195	40	80	137	1000	124	46	123	111	53	97
62	31	F	6.6	8.8	7.7	0.71	80	68	153	2.43	14	114	46	96	122	1500	278	82	122	278	82	122
63	73	M	6	7.2	6.7	0.77	61	63	150	1.2	13	66	36	88	159	2000	58	26	53	97	26	60
64	58	F	6.8	6.4	6.5	0.58	56	56	156	4.8	12	90	59	123	128	1000	101	56	131	79	65	105
65	40	M	10.5	5.9	6.3	1.01	95	99	179	9.67	58	180	36	147	173	1000	86	34	109	82	35	94
66	58	F	11.2	6.9	6.9	0.49	57.9	60	150	15.7	12	79	54	123	120	1000	83	60	128	34	67	121
67	76	M	7	7.5	7	1.5	60	59	170	39.1	14	79	60	75	139	1000	67	78	99	97	64	98
68	60	F	7.3	6.8	6.3	0.6	60	58	163	152	41	120	37	121	143	1000	171	35	81	86	35	90
69	75	F	9.7	6.8	7	0.85	55	58	141	29.6	45	142	31	88	141	1500	206	30	84	206	30	84
70	75	M	8.1	6.3	6.1	0.83	74	74	162	13.5	65	81	53	118	132	1500	53	51	109	38	51	104
71	50	M	8.5	5.4	5.3	1	69	72	169.5	9.8	49	214	29	64	166	1500	336	27	49	310	36	77
72	61	F	7.8	6.9	6.7	0.6	66	66	170	13	34	125	54	162	135	1500	96	61	128	96	61	128
73	68	F	11.5	5.5	5.4	0.9	67	68	160	7.8	32	72	46	94	127	2000	44	60	126	101	63	120
74	81	M	6.1	6.3	6.3	1.3	98	95	165	0.8	16	176	27	98	135	1500	206	24	96	137	33	113
75	52	F	6.9	8.1	7.8	0.9	64	67	160	8.8	52	97	57	131	133	1500	68	63	85	67	60	105
76	46	F	6.2	8.3	8.6	0.7	72.5	75	165	4	86	146	56	95	128	2000	105	39	83	118	53	102
77	65	F	7.4	6.6	6.1	0.6	50	52	153.4	10.5	37	101	42	93	143	1500	91	40	84	55	41	89
78	36	F	6.6	5.7	6.6	0.76	61	60	160	13	32	123	54	115	139	1500	197	45	77	197	45	77
79	75	F	6.4	6.3	5.9	0.7	58	57	150	65.5	46	69	52	54	115	1000	57	61	57	47	63	55
80	52	F	8.2	5.7	5.7	0.7	86	87	150	44.8	12	77	42	115	139	1500	149	42	115	107	35	113
81	30	M	6.4	5.8	5.8	1	82	82	175	13	87	241	42	114	151	2000	144	42	114	165	44	146
82	66	F	7.9	6.7	6.2	0.5	53	51	150	52.5	54	86	44	67	142	1000	112	61	95	212	53	118
83	71	M	11	7.2	7.6	0.8	56	51	164	22.1	79	56	51	91	147	2000	56	46	89	91	29	87
84	75	F	6.2	7.1	6.4	0.9	70	78	152	1.1	38	131	34	89	144	1000	217	24	69	137	30	78
85	59	F	8.9	6.5	6.6	0.7	56	52	142	26.4	39	229	60	97	137	2000	191	70	56	146	58	73
86	43	M	7.6	6.9	6.4	0.97	92	92	174	13	58	115	31	103	131	2000	83	34	110	83	34	110
87	77	M	6.5	6.7	6.8	1.1	59	60	170	10.3	33	103	46	116	181	1000	100	46	105	106	46	118
88	58	M	8.2	9	7.8	0.7	57	56	164	17.7	27	62	46	113	114	1000	52	45	93	50	42	90
89	42	F	6.5	5.3	6.6	0.6	60	64	155	7.4	37	115	57	138	110	2000	54	48	120	63	58	112
90	50	M	6.6	6.5	6	0.89	88	87	178	7.9	71	151	20	90	97	2000	145	28	113	124	20	90
91	62	M	6.2	6.4	6.6	1.17	68.3	76	170	641	60	47	32	74	103	2000	44	40	72	48	61	79
92	46	F	6	6.1	6.2	0.6	57.5	56	157	7.4	32	194	45	145	103	1500	128	42	116	139	46	101
93	61	M	7	6.8	6.5	1.2	63	63	160	4.8	46	196	56	109	129	2000	152	61	107	175	58	88
94	66	M	9.6	5.2	5.7	1	67	76	163	96.9	47	61	50	118	138	2000	92	50	114	76	52	77
95	56	F	6.7	8.6	6.3	0.6	60	61	156	84.6	33	109	10	54	160	2000	223	37	114	282	34	118
96	68	M	9.7	6.1	6	0.8	65	65	167	13.1	35	193	39	123	120	2000	181	37	134	286	37	105
97	67	M	7.8	6.2	6.2	1.12	67	64	160	20.5	33	249	37	103	108	1000	212	41	117	180	47	107
98	36	M	6.5	6.6	6.5	0.87	112	110	169	49.5	43	110	44	81	121	2000	138	57	94	86	51	105
99	84	M	10.5	9.2	6.4	1.2	74	73	172	5.7	34	102	51	100	122	2000	53	62	104	58	56	50
100	80	F	6.3	8.4	6	0.7	56	52	153	9	76	119	31	88	131	1000	116	29	84	138	27	72
101	31	M	6.1	5.9	6	0.6	82	82	167	7.3	52	66	33	79	137	2000	84	31	85	40	33	122
102	56	F	6.5	6.2	6.5	0.9	58	56	150	0.8	9	113	70	80	144	1500	116	84	64	83	99	60
103	75	F	6	5.7	5.6	0.7	56	56	151	37.7	15	88	66	190	179	1000	128	52	95	141	55	200
104	67	F	7	5.7	5.4	0.7	75	74	160	15.4	34	122	33	125	123	1000	88	36	119	135	31	121
105	67	F	9.8	6	6.7	0.8	42	41	150	263	8	109	47	113	129	2000	102	43	104	91	41	88
106	58	F	7.1	6.4	6.3	0.6	53	50	149	17.5	39	117	47	80	125	1000	71	42	84	74	49	86
107	80	M	7	5.6	7.2	1.1	64	64	160	9.3	79	76	51	106	116	2000	93	38	117	149	49	93
108	63	M	6.7	7.1	5.8	1.36	63	61	170	13	32	106	40	76	127	1500	141	38	73	141	38	73
109	38	M	6.8	6.6	7.4	1	90	93	174	31.7	143	189	37	112	154	2000	150	45	104	147	37	89
110	45	F	6.4	7.4	6.6	0.7	74	72	163	30.8	131	178	45	80	114	1000	200	51	104	209	51	63
111	45	M	6.7	7.4	7.7	0.9	64	72	174	7.7	33	72	50	68	126	1500	40	49	70	59	46	69
112	64	F	8.9	6.2	6.2	1.2	65	67	158	43.4	43	136	48	142	132	2000	68	54	65	91	48	67
113	55	M	7.4	6.5	6.4	1	77	77	163	26.2	60	106	40	140	125	2000	68	42	129	68	38	112
114	75	M	6.2	6.7	6.2	0.9	59	59	155	6.1	17	59	71	102	125	1000	49	69	105	51	60	108
115	38	F	7.1	6.3	6.4	0.61	63	63	160	13	29	61	54	64	146	1000	39	53	101	39	53	101
116	49	F	6.8	5.6	6	0.6	59	60	155	11.6	42	54	56	87	103	1500	87	63	101	74	78	99
117	56	F	7.8	6.4	5.7	0.7	68	68	154	8.9	68	85	67	108	149	2000	60	61	140	56	67	66
118	62	F	7.4	6.2	5	0.8	57	58	150	49.6	61	87	70	73	148	2000	86	72	76	91	81	50
119	40	F	9.4	8.5	8.4	0.8	73	68	159	6.7	17	128	53	145	139	2000	121	41	111	60	45	153
120	68	F	6.3	5	5.6	0.7	53	51	148	12.2	63	108	77	144	128	1000	122	89	105	82	86	88
121	46	M	6.5	6.2	6	0.96	68	67	161	3.89	40	364	38	110	148	1500	206	37	81	171	31	84
122	54	M	9.5	6.8	5.9	0.47	59	59	165	1303	11	85	26	103	144	2000	141	38	114	141	38	114
123	66	F	7.4	6	6.1	0.76	53	52	153	16.2	25	92	45	103	142	1000	120	49	112	81	38	62
124	78	F	7.6	7.1	8.3	1.2	73	63	164	294	34	108	59	145	133	1500	127	55	102	245	59	98
125	73	M	9.1	6.7	6.5	0.65	55	50	152	44.8	22	147	43	61	138	1500	71	42	76	297	46	121
126	59	M	9.8	6.7	7	0.87	61	62	166	15.1	23	82	55	89	119	1500	118	48	80	101	44	93
127	46	F	6	4.7	5.4	0.61	74	73	164	10.5	16	169	41	145	156	2000	156	39	110	199	41	139
128	56	M	9.5	6.1	6.2	0.87	58	57	160	2.32	16	243	46	133	130	1500	217	43	85	156	47	92
129	69	F	9.8	7.2	6.9	0.57	67	60	153	9	17	111	31	99	130	1500	94	31	98	60	36	110
130	77	F	6.8	6.5	6.9	0.54	49	49	150	24.8	14	144	32	99	143	1000	162	38	142	162	38	142
131	59	M	6.4	6.5	6.3	0.9	68.6	65	162	3.27	44	142	43	97	114	2000	84	51	102	96	50	97
132	61	M	7.7	5.9	6.1	0.95	76	74	169	7	65	250	37	129	119	1000	198	37	92	216	34	77
133	55	F	6.9	6.4	6.4	1.05	78	82	150	18	30	76	66	108	121	2000	91	62	88	81	67	123
134	71	F	9.4	5.6	5.8	0.6	60	59	154	11.2	48	157	28	90	129	1500	114	38	91	82	42	111
135	68	F	7.1	6.5	6.3	0.53	65.7	66	157	11.3	17	120	40	124	180	1500	109	49	99	109	49	99
136	33	F	6.7	7.9	6.6	0.48	92	84	156	17.9	52	93	55	93	116	2000	77	41	110	87	61	94
137	74	M	8.2	7.1	7	1.14	70	72	163	7.6	39	308	29	37	108	1500	181	29	70	159	27	58
138	78	M	6.5	5.4	5.6	1.11	75	74	167	19.7	21	109	48	90	135	1500	106	38	116	88	45	102
139	54	F	7.2	8.2	8	0.45	64	63	157	11.64	15	45	46	100	171	2000	77	39	100	77	39	100
140	66	M	7	7.6	7.3	1.2	60	61	168	3.9	28	119	55	126	145	1000	83	67	108	107	79	125
141	31	M	10.7	6	7.1	0.81	89	87	160	3.94	26	92	42	87	119	1500	142	47	114	160	40	90
142	60	M	9.2	5.9	5.9	0.89	106	100	182	329	29	414	33	149	141	2000	258	30	106	243	29	127
143	68	F	6.4	6.2	6	0.72	64	57	164	14.5	20	75	49	125	114	1000	73	48	76	120	50	94
144	65	M	9.8	6.6	5.9	1.1	65	66	163	2.77	11	111	48	110	134	2000	84	48	110	58	53	117
145	39	M	7.3	6.6	6.8	0.68	114	115	171	14.3	53	106	35	132	158	2000	104	38	102	192	38	128
146	64	F	10.2	6.4	6.7	0.53	61	55	156	2.8	26	58	51	90	160	2000	78	51	72	56	50	80
147	34	F	6.6	6.1	5.9	0.7	53	52	165	8.1	15	82	33	97	120	1000	91	42	106	73	38	99
148	49	F	6.6	6.6	6.8	0.67	97	96	159	284	146	126	54	133	148	2000	188	51	134	121	58	72
149	34	M	10	5.9	5.8	0.98	82	80	182	99.6	15	327	33	119	128	2000	245	34	116	325	35	106
150	47	M	10.1	6.3	6.7	0.8	109	104	174	69.8	34	110	56	82	137	1500	148	43	73	148	43	73
151	56	M	9.3	6.9	7	1.1	78	79	168	6.3	28	96	57	145	120	2000	217	58	134	209	53	155
152	49	M	11	6	6.4	0.77	83	81	167	5.4	26	157	35	98	144	2000	201	33	66	82	45	94
153	53	F	8.9	6	5.8	0.63	86	83	160	5.9	33	70	43	85	135	2000	58	43	85	73	41	78
154	44	M	8.4	5.6	6	0.85	82	79	170	3.66	20	105	47	117	131	2000	70	41	111	70	41	111
155	37	F	8	6.6	6.8	0.63	85	78	165	41.3	60	107	43	128	167	2000	90	36	134	69	45	86
